# Supplementary material for: Rapamycin Loaded Solid Lipid Nanoparticles as a New Tool to Deliver mTOR Inhibitors: Formulation and in Vitro Characterization
Source: MDPI journal article supplement (doi:10.3390/nano6050087), 2016-05-09
Supplement: s1 [file s1]

# Supplementary Material: Rapamycin Loaded Solid Lipid Nanoparticles as a New Tool to Deliver mTOR Inhibitors: Formulation and *in Vitro* Characterization

Alice Polchi, Alessandro Magini, Jarosław Mazuryk, Brunella Tancini, Jacek Gapiński, Adam Patkowski, Stefano Giovagnoli and Carla Emiliani

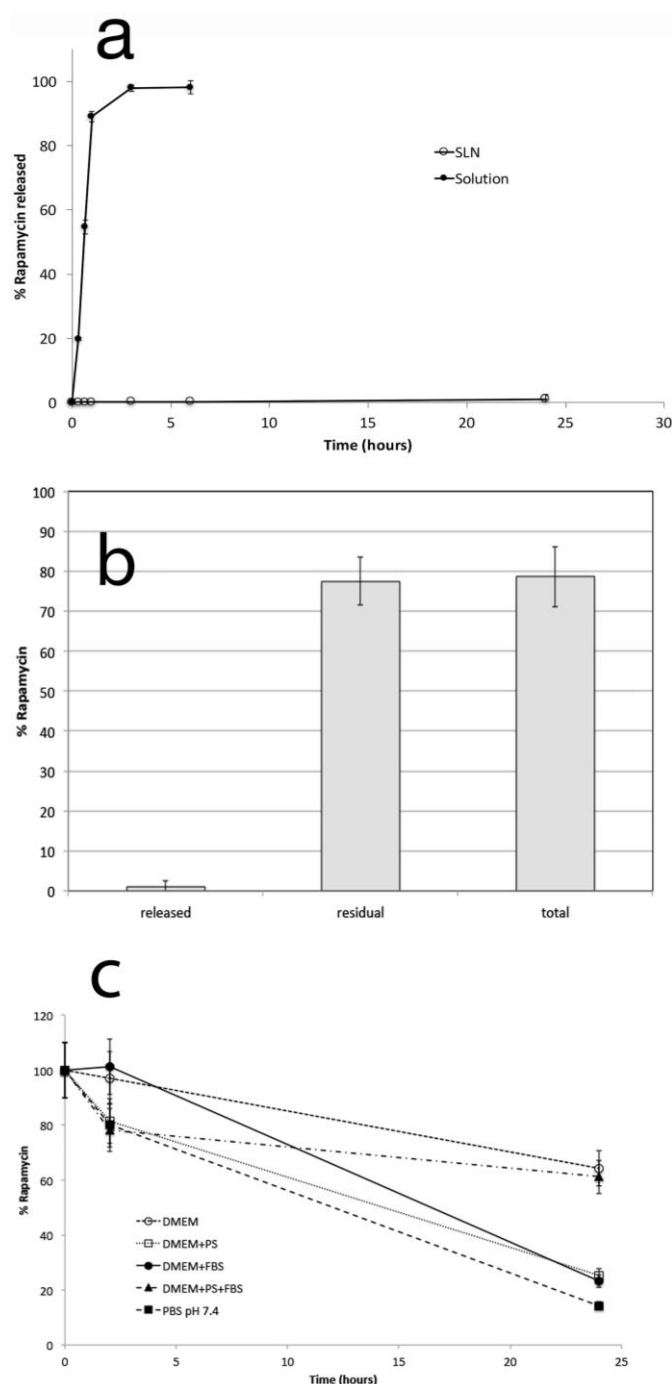

**Figure S1.** Rapamycin (Rp) stability in standard buffers and culture medium. (a) *In vitro* Rp release from Rp loaded solid lipid nanoparticles (Rp-SLN) in 10% *v/v* ethanol: 0.1 M pH 7.4 phosphate buffer over 24 h at 37 °C; (b) Rp mass balance after 24 h between the released amount and the amount retained inside the SLN; (c) stability profile of Rp in different media over 24 h at 37 °C

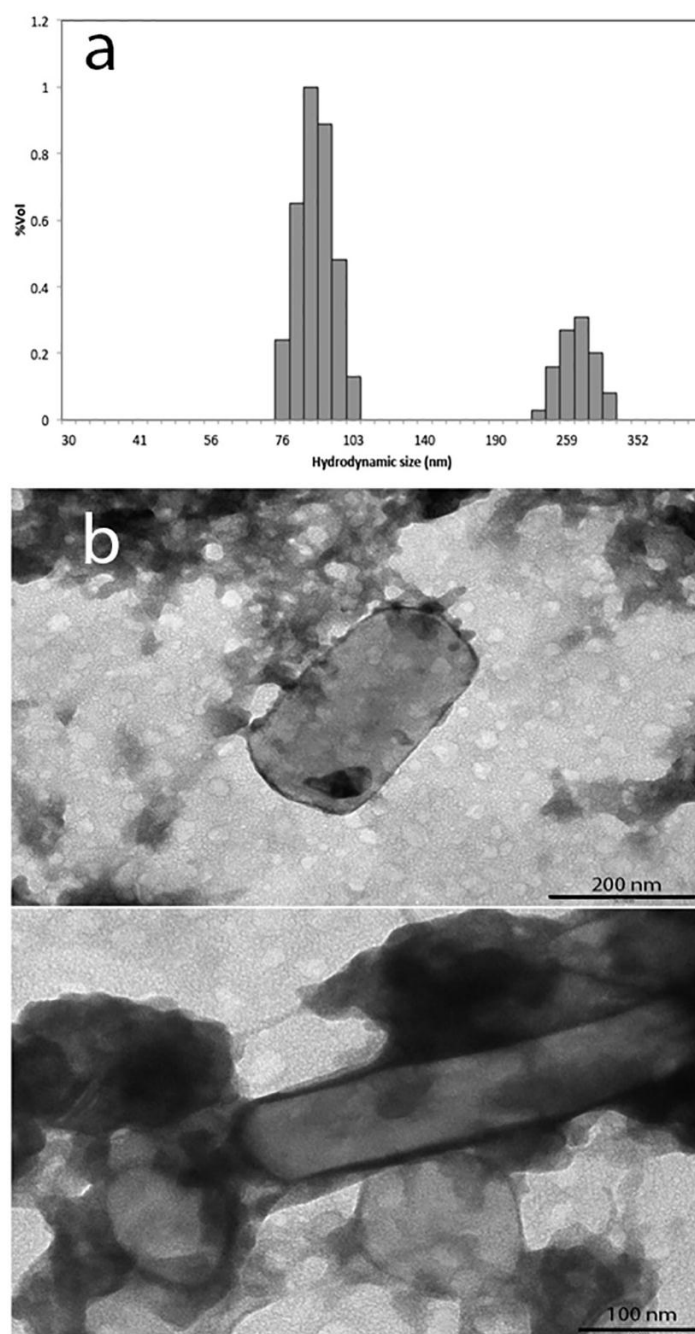

**Figure S2.** Rp nanocrystals characterization. (a) Size distribution of Rp nanocrystals; (b) Transmission electron microscopy (TEM) images of Rp nanocrystals, magnification 180,000 $\times$ .
